# Supplementary material
Source: HighWire-hosted journal article supplement (https://www.g3journal.org/content/suppl/2016/03/11/g3.116.028712)
Supplement: TableS1.pdf [file TableS1.pdf]

**Table S1:** Comparing averaged sample covariates data across ancestries, with p-values obtained from t-test.

| <b>Covariates</b>            | <b>EA</b> | <b>AA</b> | <b>p-value</b>        |
|------------------------------|-----------|-----------|-----------------------|
| Age                          | 29.7      | 30.1      | 0.90                  |
| Gender (F/M)                 | 3/7       | 0/10      | $2.04 \times 10^{-4}$ |
| Serum 25D concentration (nM) | 52.8      | 35.3      | $6.92 \times 10^{-6}$ |
| Serum PTH (pM)               | 27.6      | 32.7      | 0.26                  |
| RNA concentration (ng/mL)    | 53.6      | 44.0      | 0.16                  |
| RIN                          | 8.2       | 8.6       | 0.90                  |

**EA** = European-American, **AA** =African-American, **F** = Female, **M** = Male.
